# Supplementary material
Source: Springer Nature journal article supplement (https://www.springermedizin.de/resource/supplementary/12877_2009_322_MOESM2_ESM.pdf/9439384)

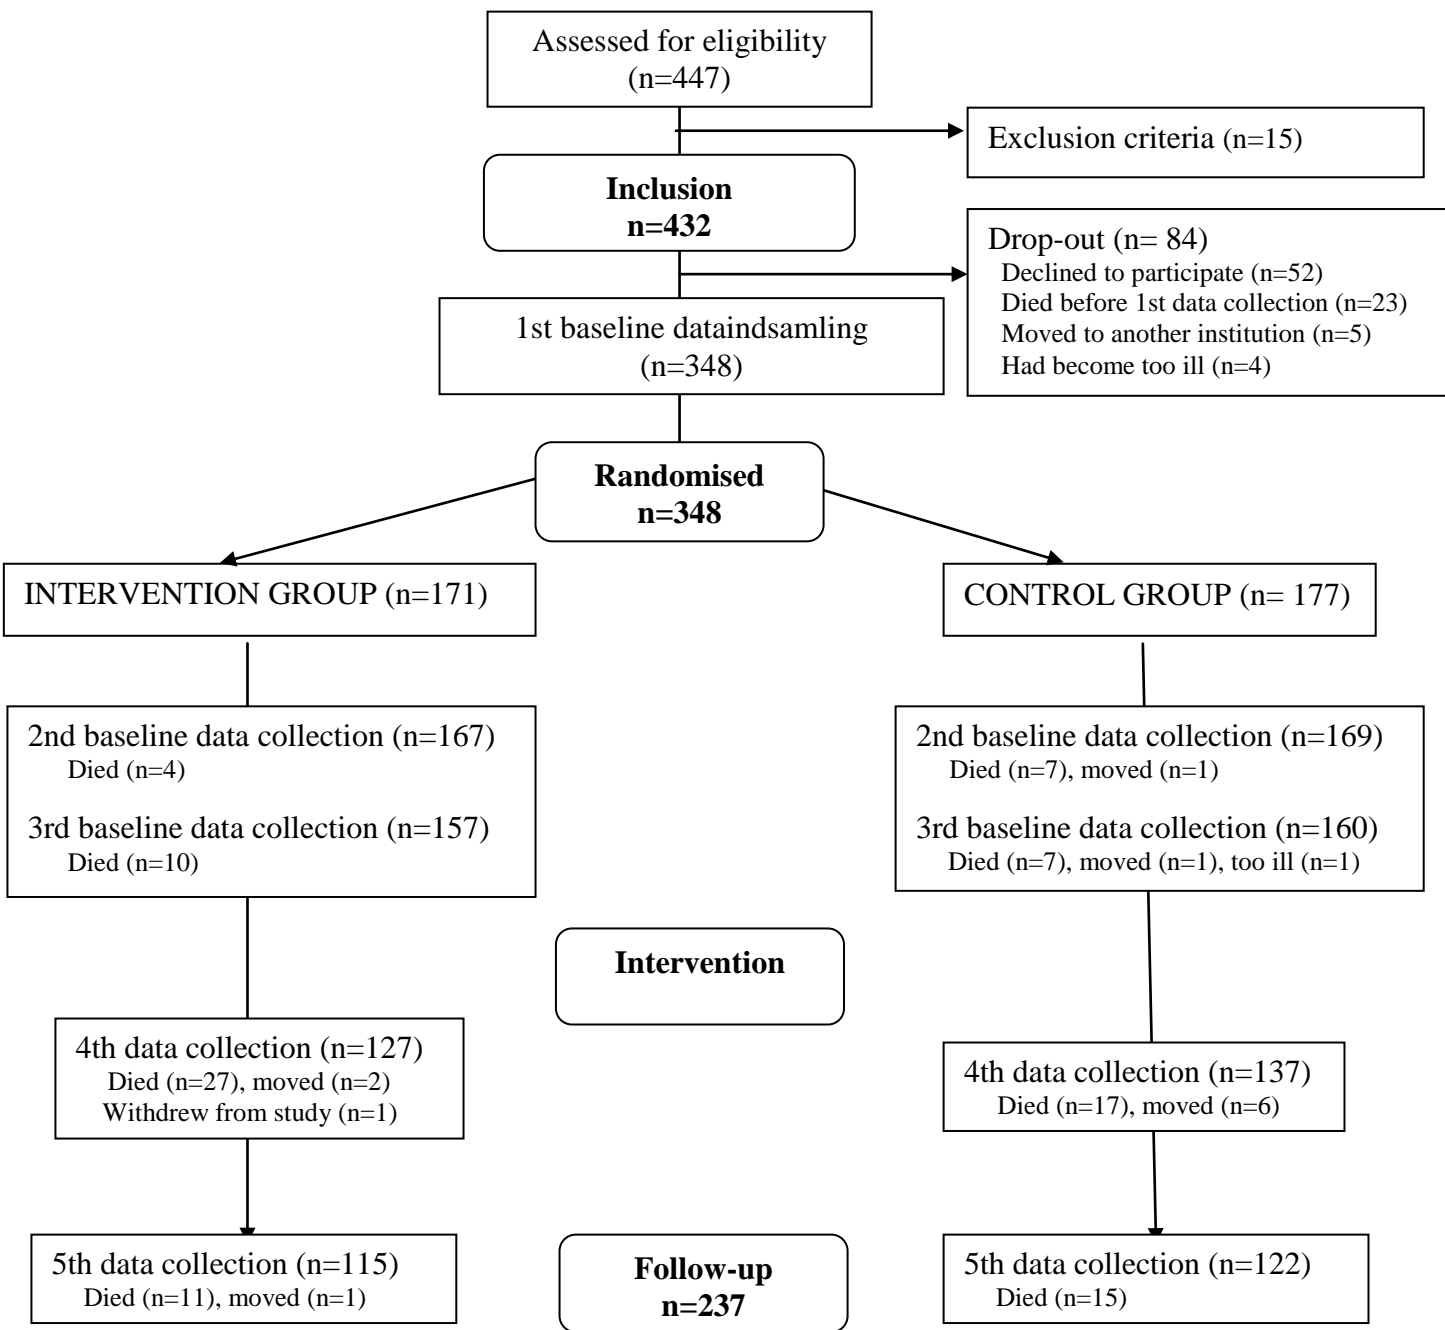

Supplement: MOESM2 [file 9439384]
